# Supplementary material
Source: publisher site journal article supplement (https://www.dovepress.com/article/238984)
Supplement: Supplementary file 1 [file get_supplementary_file.php]

**Second-Hand Smoke Exposure Questionnaire**

**I. Home Exposure**

1) Does anyone smoke in your household?

A. Yes

B. No

**If your answer is (No) move to section II (Public Exposure)**

2) Did they smoke in the same room that you were presented in?

A. Yes

B. No

3) On average, how many people smoke in your household daily?

Specify:--------------------

4) On average, how many cigarettes per day do people smoke in your household?

Specify:--------------------

5) On average, how many hours per day are you exposed to cigarette smoking in your household?

Specify:-------------------

6) How much do you think that you are exposed to tobacco smoke in your household?

A. Not at all

B. Somewhat

C. Moderately

D. A lot

E. Extremely

**II: Public Exposure**

1) Do you go out to public areas (e.g. restaurant, wedding, consolation….)?

A) Yes

B) No

**- If your answer is (No) move to question # 6**

2) Is smoking allowed in these public areas?

A) Yes

B) No

**- If your answer is (No) move to question # 6**

3) On average, how many people smoke inside these areas when you go there?

Specify: ---------------------------

4) On average, how many cigarettes do people smoke when you go there?

Specify: -------------------------

5) On average, how many hours per week are you exposed to cigarette smoking in

public places?

Specify: ------------------------------

6) Do you go out to a friend`s or relative`s house?

A) Yes

B) No

**- If your answer is (No) move to section III (Transportation Exposure)**

7) Is smoking allowed in your friend`s or relative`s house?

A) Yes

B) No

**- If your answer is (No) move to section III (Transportation Exposure)**

8) On average, how many people smoke inside your friend`s or relative`s house when

you go there?

Specify:---------------------------

9) On average, how many cigarettes do people smoke when you go there?

Specify -------------------------

10) On average, how many hours per week are you exposed to cigarette smoking in your

friend`s or relative`s house?

Specify:----------------------------

11) How much do you think you are exposed to tobacco smoke when you go out to

public areas, friend`s or relative`s house?

A. Not at all

B. Somewhat

C. Moderately

D. A lot

E. Extremely

**III: Transportation Exposure**

1) Is smoking allowed inside the vehicle that you mostly use?

A. Yes

B. No

**- If your answer is (No) move to section IV (Workplace Exposure).**

2) On average, how many people smoke inside the vehicles that you use?

Specify:------------------------

3) On average, how many cigarettes do they smoke each time?

Specify:--------------------------

4) On average, how many hours per week are you exposed to cigarette smoking in

transportation?

Specify:--------------------------

5) How much do you think that you are exposed to tobacco smoke when you use

transportation?

A. Not at all

B. Somewhat

C. Moderately

D. A lot

E. Extremely

**IV: Workplace Exposure**

1) Did you work outside the household in the past year?

A. Yes

B. No

**- If your answer is (No) finish.**

2) Is smoking allowed at your workplace?

A. Yes

B. No

**- If your answer is (No) finish.**

3) How do you describe your workplace setting?

A. Outdoors

B. Semi-doors

C. Indoors

4) On average, how many people smoke at your workplace daily?

Specify:------------------

5) On average, how many cigarettes per day do your co-workers smoke inside the

workplace?

Specify:------------------

6) On average, how many hours per day are you exposed to cigarette smoking at your workplace?

Specify:--------------------------

7) How much do you think that you are exposed to tobacco smoke at your workplace?

A. Not at all

B. Somewhat

C. Moderately

D. A lot

E. Extremely
